# Supplementary material
Source: Springer Nature journal article supplement (https://www.springermedizin.de/resource/supplementary/12955_2012_1069_MOESM1_ESM.pdf/9559192)
Supplement: MOESM1 [file 9559192]

**Figure 1: Total scale scores on PedsQL NF1 Module among 3 groups of NF1 adults based on self-reported health status**

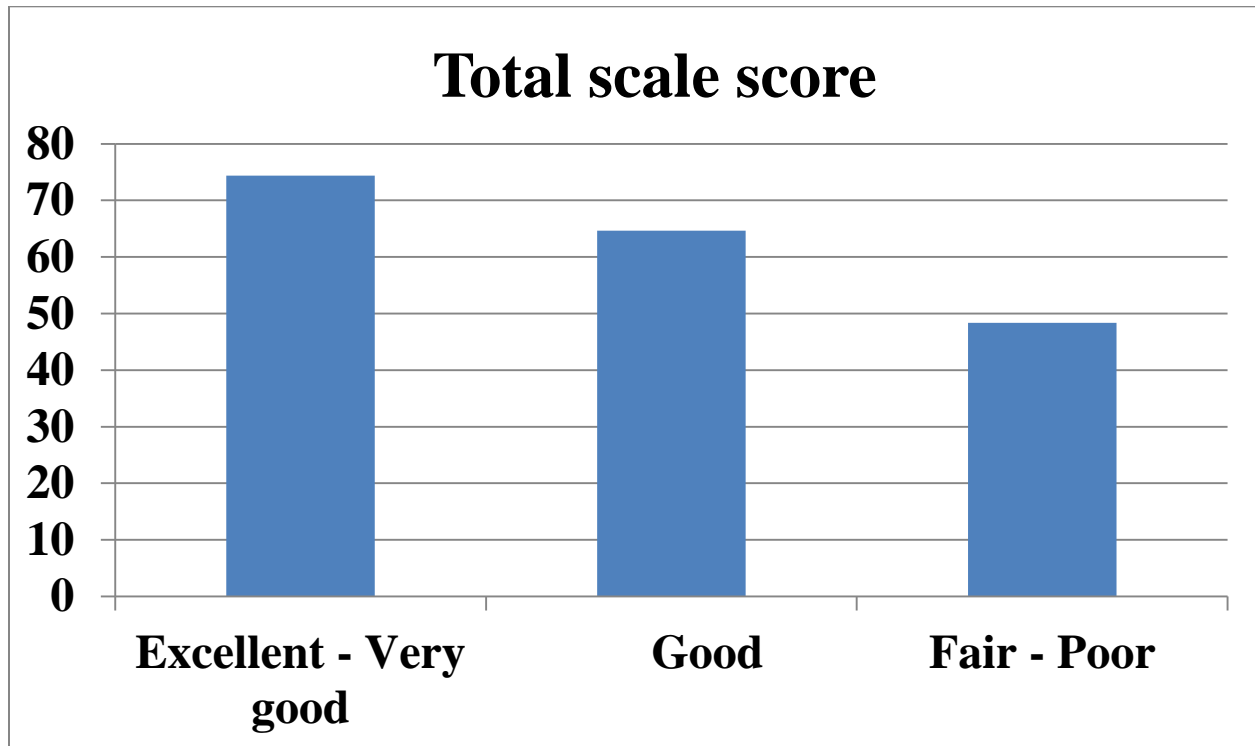

Bar chart comparing the total scale scores on PedsQL™ NF1 Module among three groups of NF1 adults based on self-reported health status. The total scale scores were significantly different among the three groups by one-way ANOVA ( $p < .0001$ ). NF1 adults with 'excellent to good' health status had highest scores whereas 'fair to poor' health status had the lowest.
